# Supplementary material for: Monitoring Therapeutic Responses to Silicified Cancer Cell Immunotherapy Using PET/MRI in a Mouse Model of Disseminated Ovarian Cancer
Source: MDPI journal article supplement (doi:10.3390/ijms231810525), 2022-09-10

## **Supplemental Data**

### **Monitoring therapeutic responses to silicified cancer cell immunotherapy using PET/MRI in a mouse model of disseminated ovarian cancer**

*Erik N. Taylor\*, Colin M. Wilson\*, Stefan Franco, Henning De May, Lorél Y. Medina  
Yirong Yang, Erica B. Flores, Eric Barte, Reed G. Selwyn, Rita E. Serda*

C.M. Wilson, E.N. Taylor, R.G. Selwyn. Department of Radiology, University of New Mexico Health Science Center, Albuquerque, NM 87131, USA; S. Franco, L.Y. Medina, E.B. Flores, E. Barte, R.E. Serda. Internal Medicine, University of New Mexico Health Science Center, Albuquerque, NM 87131, USA; H. De May, Department of Obstetrics & Gynecology, University of New Mexico Health Science Center, Albuquerque, NM 87131, USA; Y. Yang, Pharmaceutical Sciences, University of New Mexico Health Science Center, Albuquerque, NM 87131, USA

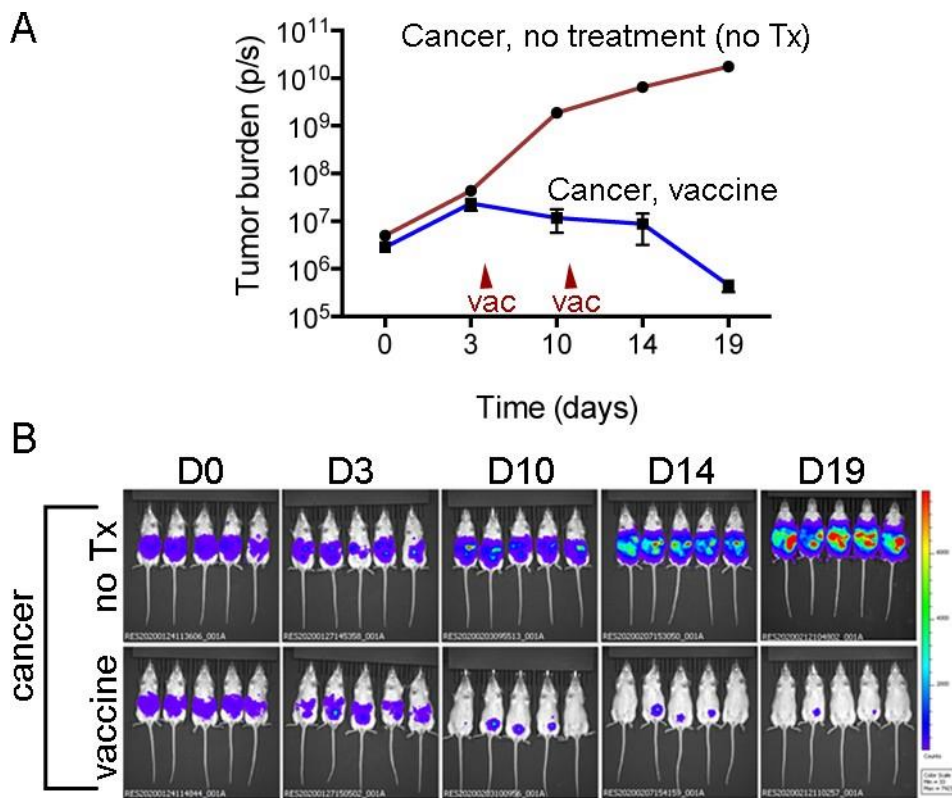

**Figure S1.** Additional efficacy data on therapeutic vaccination of mice with disseminated ovarian cancer. Bioluminescent images (**A**) and graphs (**B**) of tumor burden (photons/s) for FVB mice injected IP with  $2 \times 10^5$  BR5-*akt*-Luc2 cells (Day 0) and vaccinated with  $3 \times 10^6$  BR5-*akt* vaccine cells (Days 4 and 11).

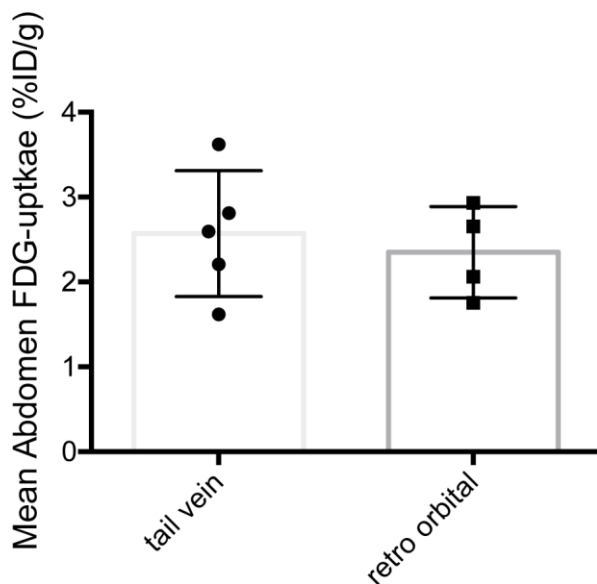

**Figure S2.** Impact of injection route on abdominal FDG uptake. Abdominal FDG-uptake (%ID/g) in untreated, tumor-bearing mice following either retro-orbital ( $n=4$ ) or tail vein ( $n=5$ ) injection of [ $^{18}\text{F}$ ]FDG. Statistical analysis was performed using an unpaired, parametric, two-tailed t-test. No significant differences were observed in abdominal uptake between the different injection methods.

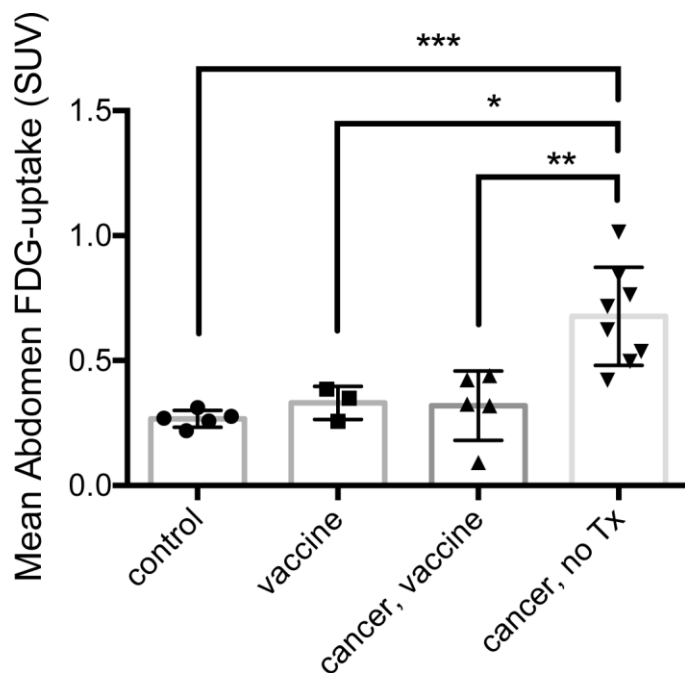

**Figure S3.** Abdominal FDG-uptake using the Standardized Uptake Value (SUV). Abdominal [ $^{18}\text{F}$ ]FDG concentration normalized by injected dose per unity body weight in control (naïve), vaccinated (+/- cancer), and untreated cancer bearing mice. Statistical analysis between groups was carried out using ANOVA with multiple comparisons by Tukey's test. The comparisons were significantly different as indicated by \*  $p \leq 0.05$ , \*\*  $p \leq 0.01$ , and \*\*\* $p \leq 0.001$ .

**Figure S4.** Whole blood glucose levels in mice pre- $^{18}\text{F}$ ]FDG administration. Pre-scan whole blood glucose (PreWBglc) levels were similar treatment groups.

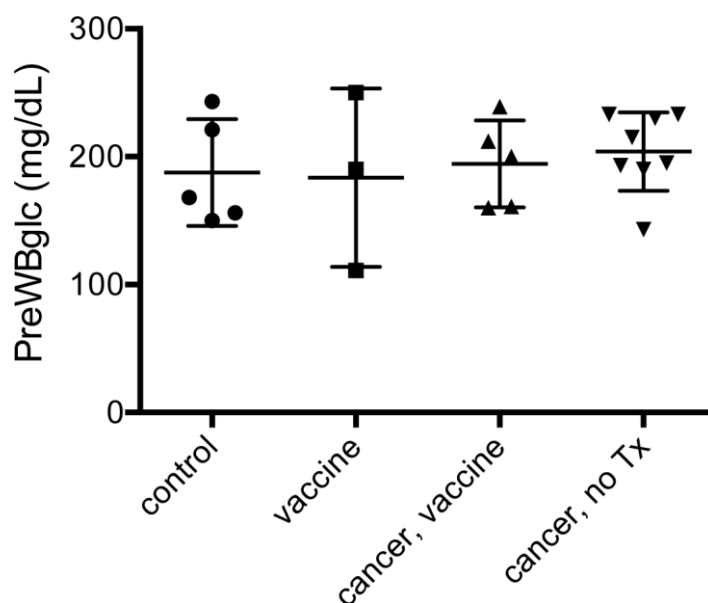

Supplement: s1 [file s1]
